# Supplementary material for: Integrated network analysis reveals a novel role for the cell cycle in 2009 pandemic influenza virus-induced inflammation in macaque lungs
Source: PubMed Central journal article supplement (PMC3481363; doi:10.1186/1752-0509-6-117), 2012-08-31

accumulation of macrophages  
 accumulation of natural killer cells  
 accumulation of T lymphocytes  
 activation of monocytes  
 activation of neutrophils  
 attraction of macrophages  
 attraction of T lymphocytes  
 cell movement of neutrophils  
 cell movement of T lymphocytes  
 cell movement of Th1 cells  
 chemoattraction of monocytes  
 chemotaxis of eosinophils  
 chemotaxis of macrophages  
 chemotaxis of memory T lymphocytes  
 chemotaxis of neutrophils  
 trafficking of T lymphocytes  
 chemotaxis of peripheral blood monocytes  
 developmental process of antigen presenting cells  
 shape change of basophils  
 infiltration by monocytes  
 migration of dendritic cells  
 NK cell migration  
 recruitment of macrophages  
 recruitment of monocytes  
 recruitment of neutrophils  
 recruitment of T lymphocytes

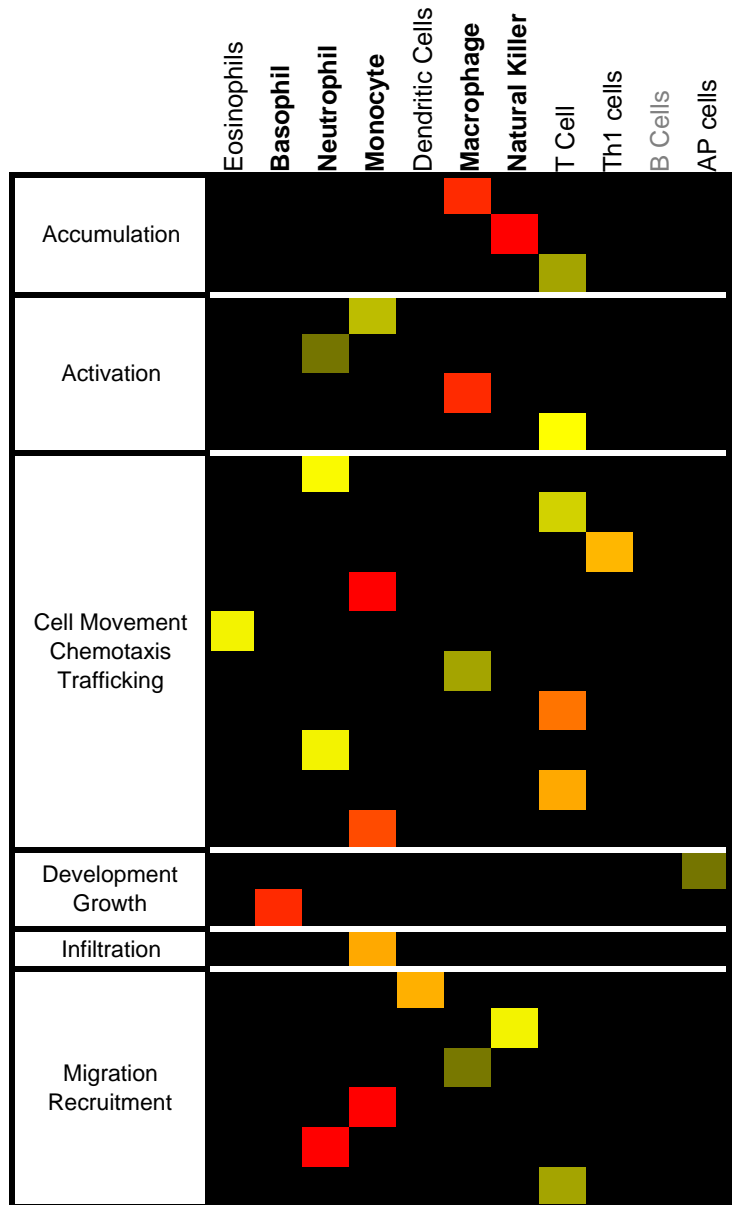

Supplement: 1752-0509-6-117-S7.pdf [file 1752-0509-6-117-S7.pdf]
