# Supplementary material for: Integrated network analysis reveals a novel role for the cell cycle in 2009 pandemic influenza virus-induced inflammation in macaque lungs
Source: PubMed Central journal article supplement (PMC3481363; doi:10.1186/1752-0509-6-117), 2012-08-31

accumulation of macrophages  
 activation of antigen presenting cells  
 activation of cytotoxic T cells  
 activation of dendritic cells  
 activation of macrophages  
 activation of monocytes  
 activation of neutrophils  
 activation of T lymphocytes  
 cell movement of antigen presenting cells  
 cell movement of eosinophils  
 cell movement of macrophages  
 cell movement of T lymphocytes  
 chemotaxis of T lymphocytes  
 developmental process of antigen presenting cells  
 developmental process of B cell lymphoma cells  
 developmental process of dendritic cells  
 developmental process of macrophages  
 differentiation of antigen presenting cells  
 differentiation of dendritic cells  
 differentiation of macrophages  
 differentiation of monocytes  
 maturation of dendritic cells  
 infiltration by macrophages  
 infiltration by monocytes  
 infiltration by T lymphocytes  
 migration of dendritic cells  
 recruitment of macrophages  
 recruitment of neutrophils  
 recruitment of T lymphocytes  
 migration of antigen presenting cells  
 cell death of T lymphocytes  
 induction of helper T lymphocytes  
 induction of T lymphocytes  
 modification of T lymphocytes  
 proliferation of B lymphocytes  
 proliferation of T lymphocytes  
 quantity of antigen presenting cells  
 quantity of macrophages

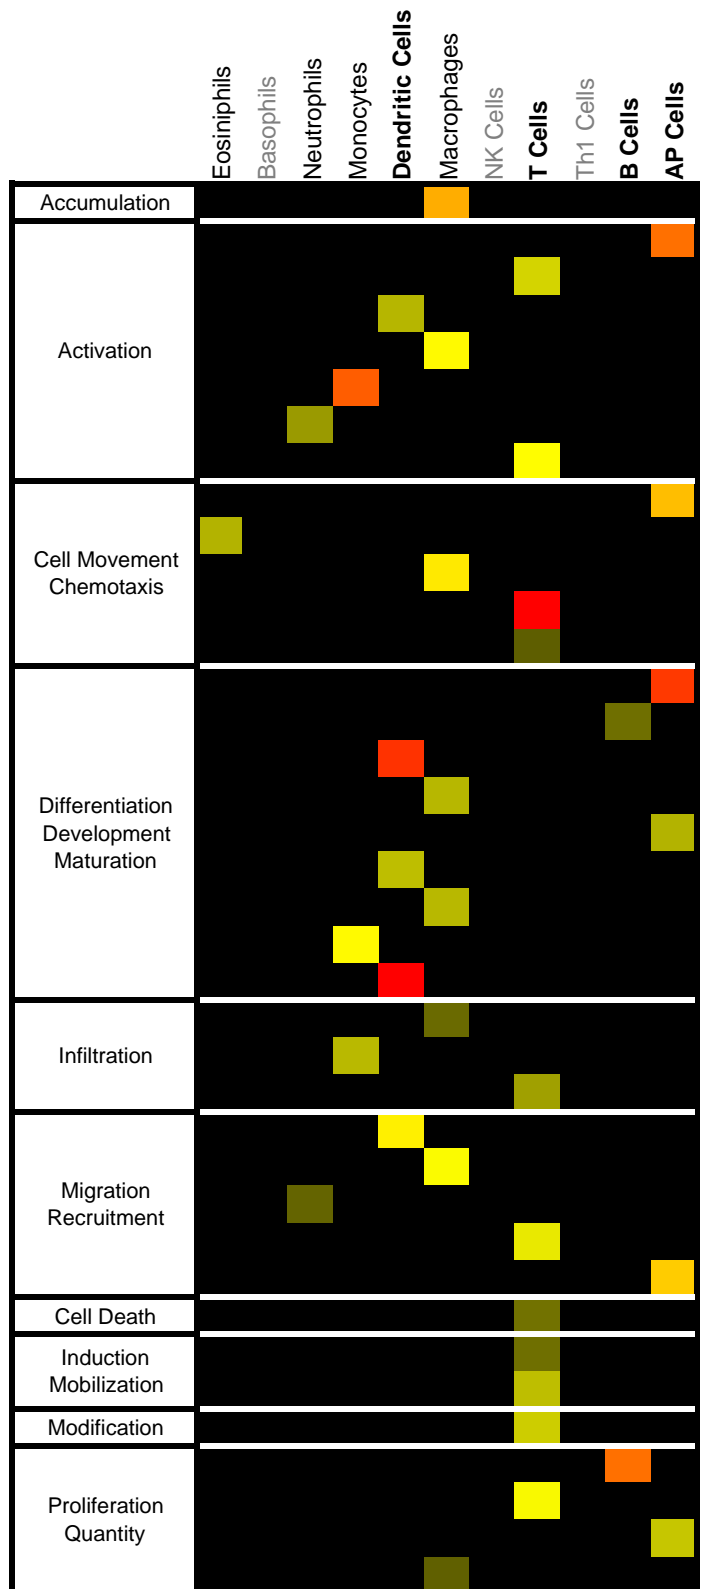

Supplement: 1752-0509-6-117-S8.pdf [file 1752-0509-6-117-S8.pdf]
